# Supplementary material for: Biocomputational Assessment of Natural Compounds as a Potent Inhibitor to Quorum Sensors in Ralstonia solanacearum
Source: MDPI journal article supplement (doi:10.3390/molecules27093034), 2022-05-09
Supplement: s1 [file s1]

# Biocomputational Assessment of Natural Compounds as a Potent Inhibitor to Quorum Sensors in *Ralstonia solanacearum*

Sunil Kumar <sup>1,2,\*</sup>, Khurshid Ahmad <sup>1</sup>, Santosh Kumar Behera <sup>3</sup>, Dipak T. Nagrale <sup>4</sup>, Anurag Chaurasia <sup>5</sup>, Manoj Kumar Yadav <sup>6</sup>, Sneha Murmu <sup>2</sup>, Yachana Jha <sup>7</sup>, Mahendra Vikram Singh Rajawat <sup>1</sup>, Deepti Malviya <sup>1</sup>, Udai B. Singh <sup>1</sup>, Raja Shankar <sup>8</sup>, Minaketan Tripathy <sup>9</sup> and Harsh Vardhan Singh <sup>1,\*</sup>

<sup>1</sup> ICAR-National Bureau of Agriculturally Important Microorganisms, Mau 275103, India; ahmadk@ynu.ac.kr (K.A.); rajawat.mvs@gmail.com (M.V.S.R.); deeptimalviya77@gmail.com (D.M.); nbaimudai@gmail.com (U.B.S.)

<sup>2</sup> ICAR-Indian Agricultural Statistics Research Institute, New Delhi 110012, India; murmu.sneha22@gmail.com

<sup>3</sup> National Institute of Pharmaceutical Education and Research, Ahmedabad 382355, India; bioinfo.santosh@gmail.com

<sup>4</sup> ICAR-Central Institute for Cotton Research, Nagpur 440010, India; dip29unique@gmail.com

<sup>5</sup> ICAR- Indian Institute of Vegetable Research, Varanasi 221305, India; govtfindia.icar@gmail.com

<sup>6</sup> Department of Bioinformatics, SRM University, Sonepat 131029, India; manojiids@gmail.com

<sup>7</sup> N. V. Patel College of Pure and Applied Sciences, S.P. University, Anand 388315, India; yachanajha@ymail.com

<sup>8</sup> ICAR-IIHR, Hessaraghatta Lake Post, Bengaluru 560089, India; rajascientists@gmail.com

<sup>9</sup> Department of Pharmacy, Sitaram Kashyap College of Pharmacy, Rahod, Chhattisgarh 495556, India; minaketantripathy@gmail.com

\* Correspondence: skybiotech@gmail.com (S.K.); drharsh2006@rediffmail.com (H.V.S.)

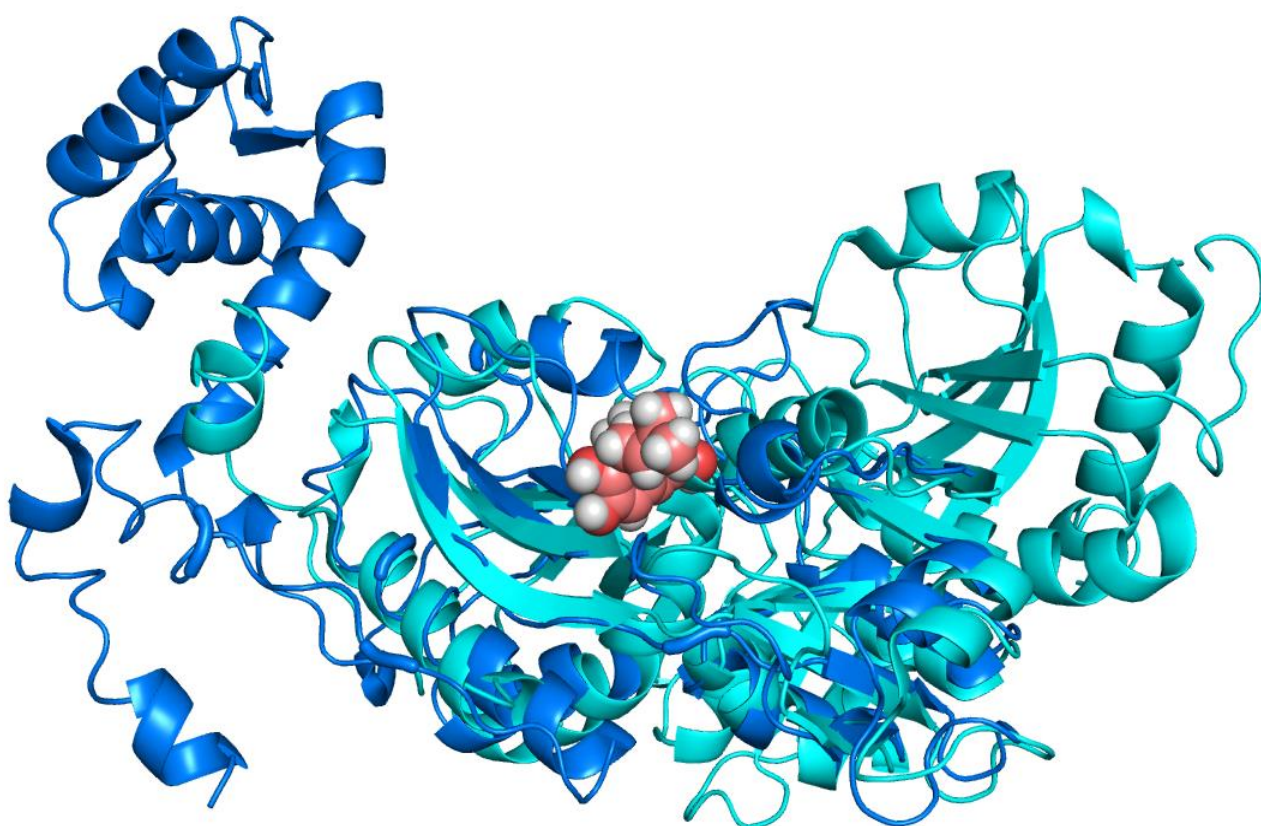

**Figure S1.** Phc A (Blue color) superimposed with matched reference structure 1(UTH) (cyan color).

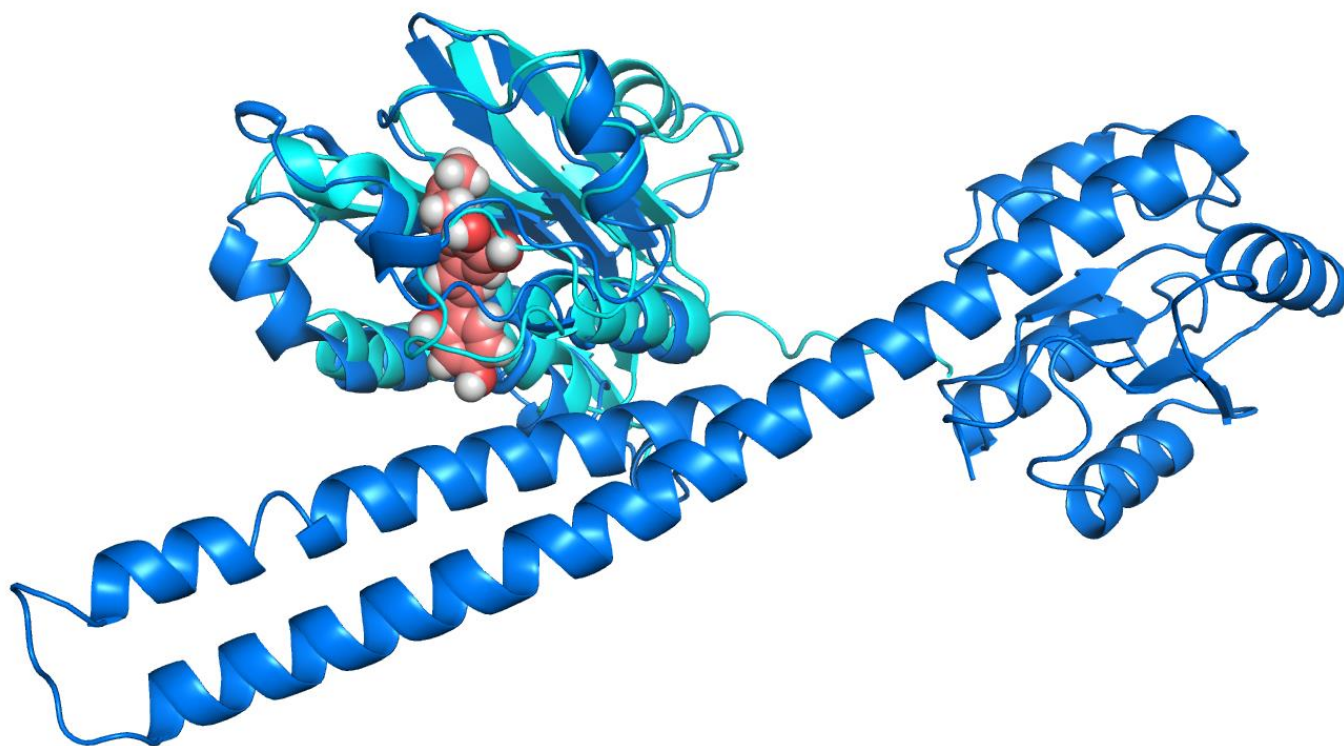

**Figure S2.** Phc R (Blue color) superimposed with matched reference structure 5idm (cyan color).
